# Supplementary material for: Porphyromonas gingivalis Produce Neutrophil Specific Chemoattractants Including Short Chain Fatty Acids
Source: PubMed Central journal article supplement (PMC7851090; doi:10.3389/fcimb.2020.620681), 2021-01-19
Supplement: DataSheet_5.pdf [file DataSheet_5.pdf]

(A)

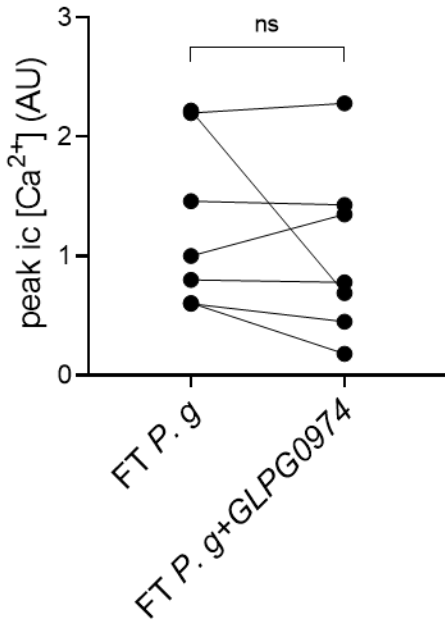

(B)

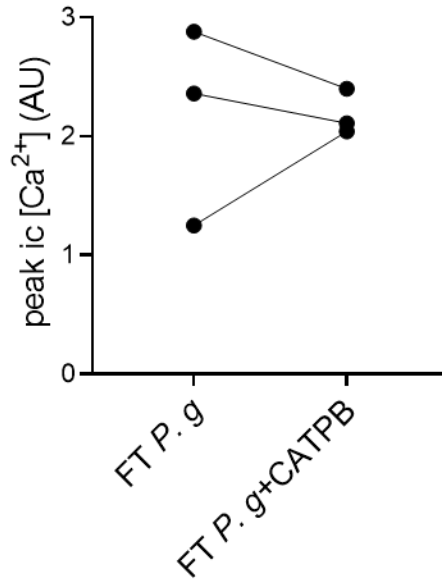

**Supplementary figure 5. Effect of the FFA2R antagonists (GLPG0974 and CATPB) on intracellular calcium signals triggered by the *P. gingivalis* FT fraction.** The FT fraction of the culture supernatant of *P. gingivalis* 381 was used to stimulate neutrophils in the presence or absence of a FFA2R antagonists (GLPG0974 or CATPB), and intracellular Ca<sup>2+</sup> concentration was monitored by flow cytometry. Graphs show peak values of the neutrophil intracellular Ca<sup>2+</sup> response after stimulation with the *P. g* FT fraction in presence or absence of GLPG0974 (n = 7) **(A)** or CATPB (n = 3) **(B)**. Wilcoxon matched-pairs signed rank test was used to analyse statistics.
